# Supplementary material
Source: Research Square preprint supplement (doi:10.21203/rs.3.rs-9616708/v1)
Supplement: Supplementary file 1 [file b8015721b5392c98be20ee8a.pdf]

# Supplemental analysis: Data reanalysis DNA Transposons Favor De Novo Transcript Emergence Through Enrichment of Transcription Factor Binding Motifs

Marie Kristin Lebherz, Bertrand Fouks, Erich Bornberg-Bauer and Anna Grandchamp

March 10, 2026

## 1. TE overlap in *de novo* transcripts and surrounding regions

**Table 1:** Summary of the statistical Model (glmmTMB): TE\_overlap  $\sim$  Type + (1—Population), Zero-inflation:Type + (1—Population), Gamma family

|                                                                         | TransposonUltimate                  | RepeatModeler                       | MCHelper                            | EarlGrey                            | FasTE                               |
|-------------------------------------------------------------------------|-------------------------------------|-------------------------------------|-------------------------------------|-------------------------------------|-------------------------------------|
| <b>Model Statistics</b>                                                 |                                     |                                     |                                     |                                     |                                     |
| AIC                                                                     | 38005.1                             | 77019.9                             | 77373.0                             | 77890.2                             | 80883.6                             |
| BIC                                                                     | 38104.0                             | 77119.6                             | 77472.7                             | 77989.9                             | 80983.3                             |
| logLik                                                                  | -18991.5                            | -38498.9                            | -38675.5                            | -38934.1                            | -40430.8                            |
| $-2 \log(L)$                                                            | 37983.1                             | 76997.9                             | 77351.0                             | 77868.2                             | 80861.6                             |
| df.resid                                                                | 59308                               | 63873                               | 63873                               | 63873                               | 63873                               |
| <b>Random Effects (Variance / Std. Dev.)</b>                            |                                     |                                     |                                     |                                     |                                     |
| Population (Conditional model, Intercept)                               | 0.005522 / 0.07431                  | 0.0003183 / 0.01784                 | 0.000571 / 0.0239                   | 0.000928 / 0.03046                  | 0.002373 / 0.04871                  |
| Population (Zero-inflation model, Intercept)                            | 0.04597 / 0.2144                    | 0.01132 / 0.1064                    | 0.01174 / 0.1084                    | 0.007311 / 0.0855                   | 0.0098 / 0.099                      |
| <b>Conditional Model (Estimate / <math>P(&gt;  z )</math>)</b>          |                                     |                                     |                                     |                                     |                                     |
| (Intercept)                                                             | 2.81461 / $< 2 \times 10^{-16}$ *** | 1.49262 / $< 2 \times 10^{-16}$ *** | 1.45617 / $< 2 \times 10^{-16}$ *** | 1.41648 / $< 2 \times 10^{-16}$ *** | 1.69794 / $< 2 \times 10^{-16}$ *** |
| Type: Intergenic                                                        | 1.58675 / $< 2 \times 10^{-16}$ *** | 1.20586 / $< 2 \times 10^{-16}$ *** | 1.24287 / $< 2 \times 10^{-16}$ *** | 1.24000 / $< 2 \times 10^{-16}$ *** | 1.27632 / $< 2 \times 10^{-16}$ *** |
| Type: Transcript                                                        | -0.30448 / $1.4 \times 10^{-9}$ *** | -0.00817 / 0.866                    | 0.02333 / 0.629                     | 0.00001729 / 1.000                  | -0.12509 / 0.00874 **               |
| Type: Upstream                                                          | 0.01589 / 0.758                     | 0.02574 / 0.595                     | 0.02333 / 0.629                     | -0.00941                            | -0.0000487 / 0.99919                |
| <b>Pairwise Comparisons (Bonferroni-adjusted <math>p</math>-values)</b> |                                     |                                     |                                     |                                     |                                     |
| Downstream / Intergenic                                                 | $2.48 \times 10^{-20}$              | $2.57 \times 10^{-12}$              | $1.61 \times 10^{-8}$               | $5.28 \times 10^{-7}$               | $4.29 \times 10^{-15}$              |
| Downstream / Transcript                                                 | $2.58 \times 10^{-20}$              | $4.93 \times 10^{-4}$               | $2.47 \times 10^{-4}$               | $6.93 \times 10^{-5}$               | $4.78 \times 10^{-1}$               |
| Downstream / Upstream                                                   | 1.00                                | 1.00                                | 1.00                                | 1.00                                | 0.801                               |
| Intergenic / Transcript                                                 | 0.049                               | $2.68 \times 10^{-39}$              | $2.01 \times 10^{-32}$              | $1.33 \times 10^{-31}$              | $5.02 \times 10^{-27}$              |
| Intergenic / Upstream                                                   | $1.22 \times 10^{-18}$              | $7.31 \times 10^{-10}$              | $9.82 \times 10^{-8}$               | $9.85 \times 10^{-5}$               | $2.42 \times 10^{-8}$               |
| Transcript / Upstream                                                   | $4.38 \times 10^{-19}$              | $5.37 \times 10^{-5}$               | $1.17 \times 10^{-4}$               | $1.74 \times 10^{-6}$               | $6.50 \times 10^{-3}$               |

## 2. *De novo* transcripts and Motifs

### a. Comparison of Core Motifs

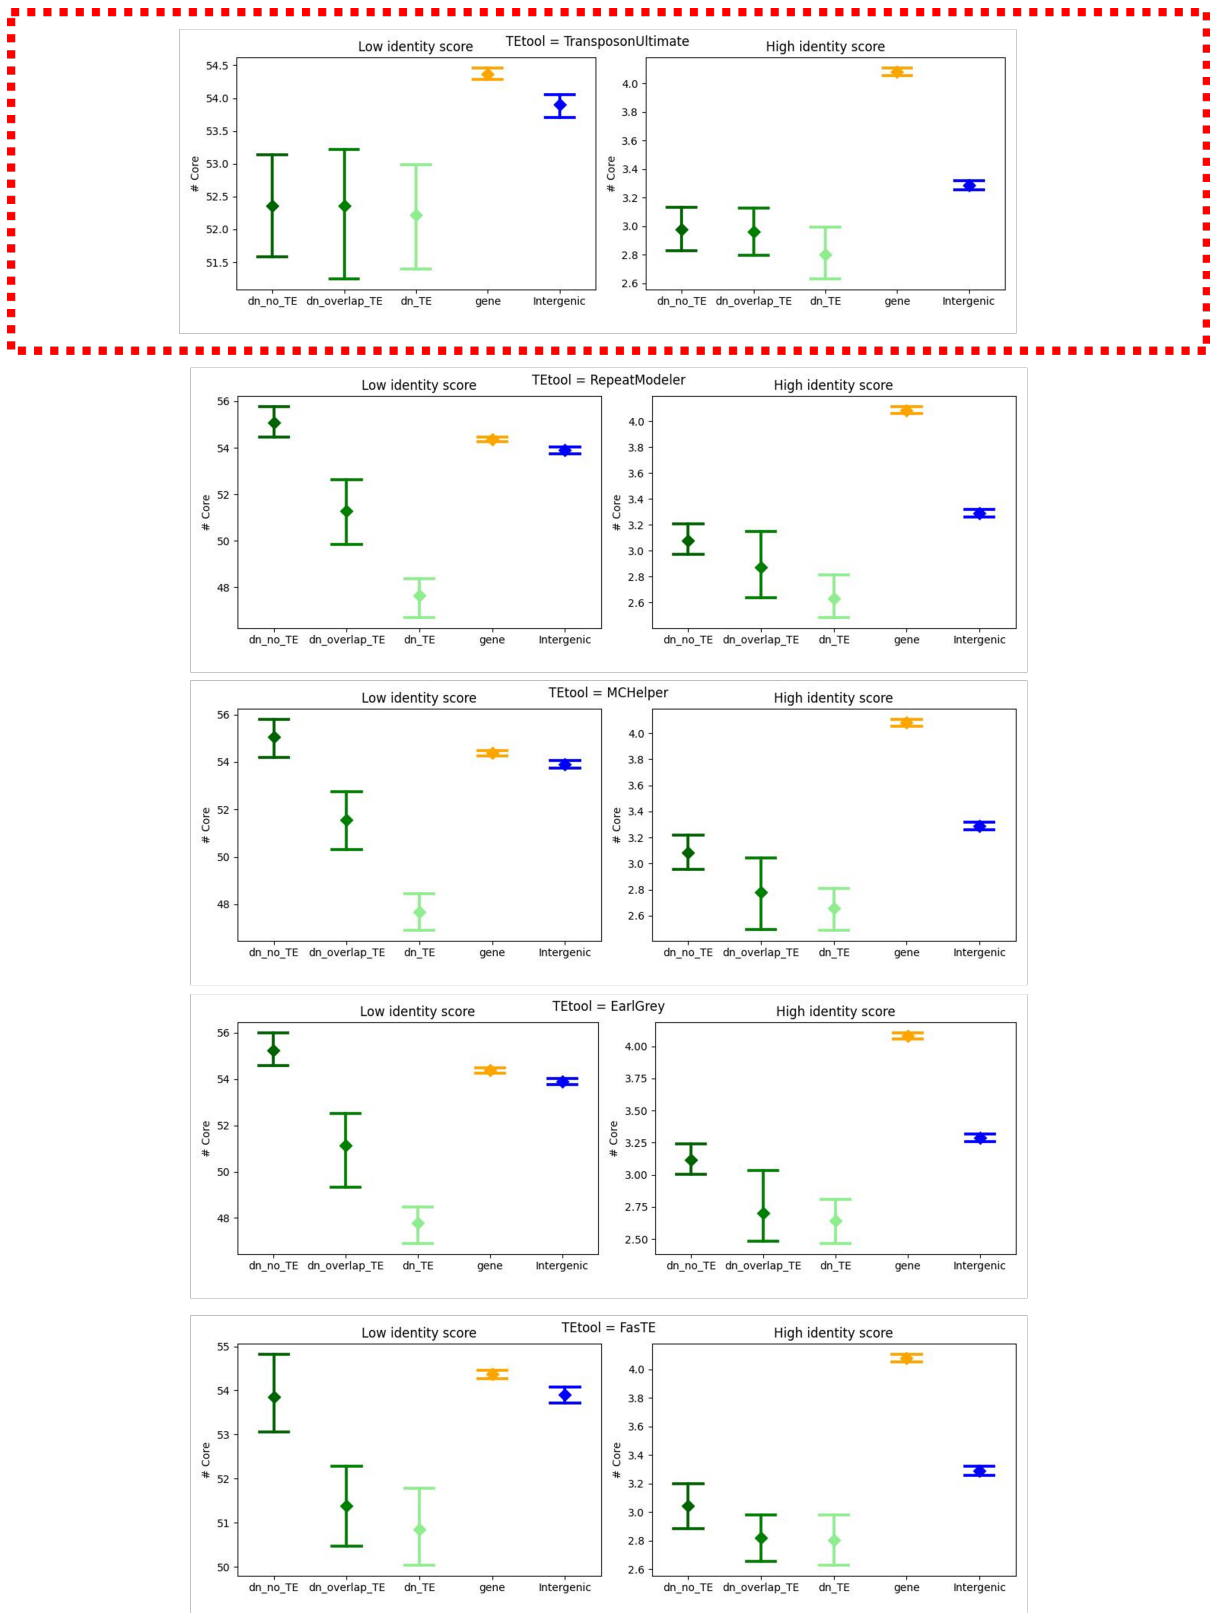

**Figure 1:** Number of core motifs per upstream region (-200/+100) based on the TE overlap of the sequence using both a low (left) and high (right) threshold. Shown is Figure 4 from the original paper. In addition to TransposonUltimate (= used in the paper, red box) we ran four additional TE detection and annotation pipelines, namely RepeatModeler, MCHelper (RepeatModeler library), EarlGrey and FasTE (combines EDTA and DeepTE)

**Table 2:** Summary of the statistical Model: NumberCore ~ Type + (1—population) (family = poisson)

|                                                            | TransposonUltimate                  | RepeatModeler                         | MCHelper                              | EarlGrey                               | FasTE                                 |
|------------------------------------------------------------|-------------------------------------|---------------------------------------|---------------------------------------|----------------------------------------|---------------------------------------|
| <b>Model Statistics</b>                                    |                                     |                                       |                                       |                                        |                                       |
| AIC                                                        | 1193124.2                           | 1191990.8                             | 1191988.0                             | 1191916.8                              | 1192936.4                             |
| BIC                                                        | 1193183.8                           | 1192050.4                             | 1192048.0                             | 1191976.5                              | 1192996.0                             |
| logLik                                                     | -596556.1                           | -595989.4                             | -595988.0                             | -595952.4                              | -596462.2                             |
| -2 log(L)                                                  | 1193112.2                           | 1191978.8                             | 1191976.0                             | 1191904.8                              | 1192924.4                             |
| df.resid                                                   | 153461                              | 153461                                | 153461                                | 153461                                 | 153461                                |
| <b>Random Effects</b>                                      |                                     |                                       |                                       |                                        |                                       |
| Population (Intercept: Var/SD)                             | 1.747e-11 / 4.18e-06                | 1.754e-11 / 4.189e-06                 | 2.049e-11 / 4.527e-06                 | 2.242e-11 / 4.735e-06                  | 1.734e-11 / 4.164e-06                 |
| <b>Model Summary (Estimate / <math>P(&gt;  z )</math>)</b> |                                     |                                       |                                       |                                        |                                       |
| (Intercept)                                                | 3.958 / $< 2 \times 10^{-16}$ ***   | 4.008996 / $< 2 \times 10^{-16}$ ***  | 4.008370 / $< 2 \times 10^{-16}$ ***  | 4.011425 / $< 2 \times 10^{-16}$ ***   | 3.986220 / $< 2 \times 10^{-16}$ ***  |
| Type: Overlap TE                                           | -1.926e-05 / 0.997                  | -0.071678 / $< 2 \times 10^{-16}$ *** | -0.065711 / $< 2 \times 10^{-16}$ *** | -0.077195 / $< 2 \times 10^{-16}$ ***  | -0.046919 / $< 2 \times 10^{-16}$ *** |
| Type: TE                                                   | -0.002604 / 0.555                   | -0.144951 / $< 2 \times 10^{-16}$ *** | -0.143761 / $< 2 \times 10^{-16}$ *** | -0.144535 / $< 2 \times 10^{-16}$ ***  | -0.057237 / $< 2 \times 10^{-16}$ *** |
| Type: Gene                                                 | 0.03772 / $< 2 \times 10^{-16}$ *** | -0.013176 / $1.54 \times 10^{-7}$ *** | -0.012551 / $5.21 \times 10^{-7}$ *** | -0.015605 / $4.35 \times 10^{-10}$ *** | 0.009600 / 0.000825 ***               |
| Type: Intergenic                                           | 0.02914 / $< 2 \times 10^{-16}$ *** | -0.021751 / $< 2 \times 10^{-16}$ *** | -0.021125 / $< 2 \times 10^{-16}$ *** | -0.024179 / $< 2 \times 10^{-16}$ ***  | 0.001025 / 0.723                      |
| <b>Pairwise Comparisons (Bonferroni-adjusted p)</b>        |                                     |                                       |                                       |                                        |                                       |
| No TE / Overlap TE                                         | 1                                   | < .0001                               | < .0001                               | < .0001                                | < .0001                               |
| No TE / TE                                                 | 1                                   | < .0001                               | < .0001                               | < .0001                                | < .0001                               |
| No TE / Gene                                               | < .0001                             | < .0001                               | < .0001                               | < .0001                                | 0.0083                                |
| No TE / Intergenic                                         | < .0001                             | < .0001                               | < .0001                               | < .0001                                | 1                                     |
| Overlap TE / TE                                            | 1                                   | < .0001                               | < .0001                               | < .0001                                | 0.4313                                |
| Overlap TE / Gene                                          | < .0001                             | < .0001                               | < .0001                               | < .0001                                | < .0001                               |
| Overlap TE / Intergenic                                    | < .0001                             | < .0001                               | < .0001                               | < .0001                                | < .0001                               |
| TE / Gene                                                  | < .0001                             | < .0001                               | < .0001                               | < .0001                                | < .0001                               |
| TE / Intergenic                                            | < .0001                             | < .0001                               | < .0001                               | < .0001                                | < .0001                               |
| Gene / Intergenic                                          | < .0001                             | < .0001                               | < .0001                               | < .0001                                | < .0001                               |

**Table 3:** Summary of the statistical Model: NumberCoreHigh ~ Type + (1—population) (family = poisson)

|                                                            | TransposonUltimate                    | RepeatModeler                        | MCHelper                              | EarlGrey                             | FasTE                                |
|------------------------------------------------------------|---------------------------------------|--------------------------------------|---------------------------------------|--------------------------------------|--------------------------------------|
| <b>Model Statistics</b>                                    |                                       |                                      |                                       |                                      |                                      |
| AIC                                                        | 687742.2                              | 687682.1                             | 687681.9                              | 687658.6                             | 687729.6                             |
| BIC                                                        | 687801.8                              | 687741.7                             | 687741.5                              | 687718.2                             | 687789.2                             |
| logLik                                                     | -343865.1                             | -343835.0                            | -343834.9                             | -343823.3                            | -343858.8                            |
| -2 log(L)                                                  | 687730.2                              | 687670.1                             | 687669.9                              | 687646.6                             | 687717.6                             |
| df.resid                                                   | 153461                                | 153461                               | 153461                                | 153461                               | 153461                               |
| <b>Random Effects</b>                                      |                                       |                                      |                                       |                                      |                                      |
| Population (Intercept: Var/SD)                             | 3.955e-10 / 1.989e-05                 | 2.475e-10 / 1.573e-05                | 3.194e-10 / 1.787e-05                 | 3.36e-10 / 1.833e-05                 | 2.545e-10 / 1.595e-05                |
| <b>Model Summary (Estimate / <math>P(&gt;  z )</math>)</b> |                                       |                                      |                                       |                                      |                                      |
| (Intercept)                                                | 1.090720 / $< 2 \times 10^{-16}$ ***  | 1.12365 / $< 2 \times 10^{-16}$ ***  | 1.12647 / $< 2 \times 10^{-16}$ ***   | 1.13594 / $< 2 \times 10^{-16}$ ***  | 1.11366 / $< 2 \times 10^{-16}$ ***  |
| Type: Overlap TE                                           | -0.005165 / 0.797                     | -0.06900 / 0.00409 **                | -0.10372 / $5.09 \times 10^{-5}$ ***  | -0.14188 / $3.49 \times 10^{-7}$ *** | -0.07650 / $6.17 \times 10^{-5}$ *** |
| Type: TE                                                   | -0.060509 / 0.00129 **                | -0.15556 / $< 2 \times 10^{-16}$ *** | -0.14879 / $3.64 \times 10^{-16}$ *** | -0.16420 / $< 2 \times 10^{-16}$ *** | -0.08314 / $2.74 \times 10^{-5}$ *** |
| Type: Gene                                                 | 0.315543 / $< 2 \times 10^{-16}$ ***  | 0.28261 / $< 2 \times 10^{-16}$ ***  | 0.27979 / $< 2 \times 10^{-16}$ ***   | 0.27033 / $< 2 \times 10^{-16}$ ***  | 0.29260 / $< 2 \times 10^{-16}$ ***  |
| Type: Intergenic                                           | 0.099363 / $4.88 \times 10^{-15}$ *** | 0.06643 / $5.97 \times 10^{-10}$ *** | 0.06361 / $2.51 \times 10^{-9}$ ***   | 0.05415 / $3.57 \times 10^{-7}$ ***  | 0.07642 / $3.34 \times 10^{-10}$ *** |
| <b>Pairwise Comparisons (Bonferroni-adjusted p)</b>        |                                       |                                      |                                       |                                      |                                      |
| No TE / Overlap TE                                         | 1                                     | 0.0409                               | 0.0005                                | < .0001                              | 0.0006                               |
| No TE / TE                                                 | 0.0129                                | < .0001                              | < .0001                               | < .0001                              | 0.0003                               |
| No TE / Gene                                               | < .0001                               | < .0001                              | < .0001                               | < .0001                              | < .0001                              |
| No TE / Intergenic                                         | < .0001                               | < .0001                              | < .0001                               | < .0001                              | < .0001                              |
| Overlap TE / TE                                            | 0.088                                 | 0.0111                               | 1                                     | 1                                    | 1                                    |
| Overlap TE / Gene                                          | < .0001                               | < .0001                              | < .0001                               | < .0001                              | < .0001                              |
| Overlap TE / Intergenic                                    | < .0001                               | < .0001                              | < .0001                               | < .0001                              | < .0001                              |
| TE / Gene                                                  | < .0001                               | < .0001                              | < .0001                               | < .0001                              | < .0001                              |
| TE / Intergenic                                            | < .0001                               | < .0001                              | < .0001                               | < .0001                              | < .0001                              |
| Gene / Intergenic                                          | < .0001                               | < .0001                              | < .0001                               | < .0001                              | < .0001                              |

## b. Comparison of TFBS Motifs

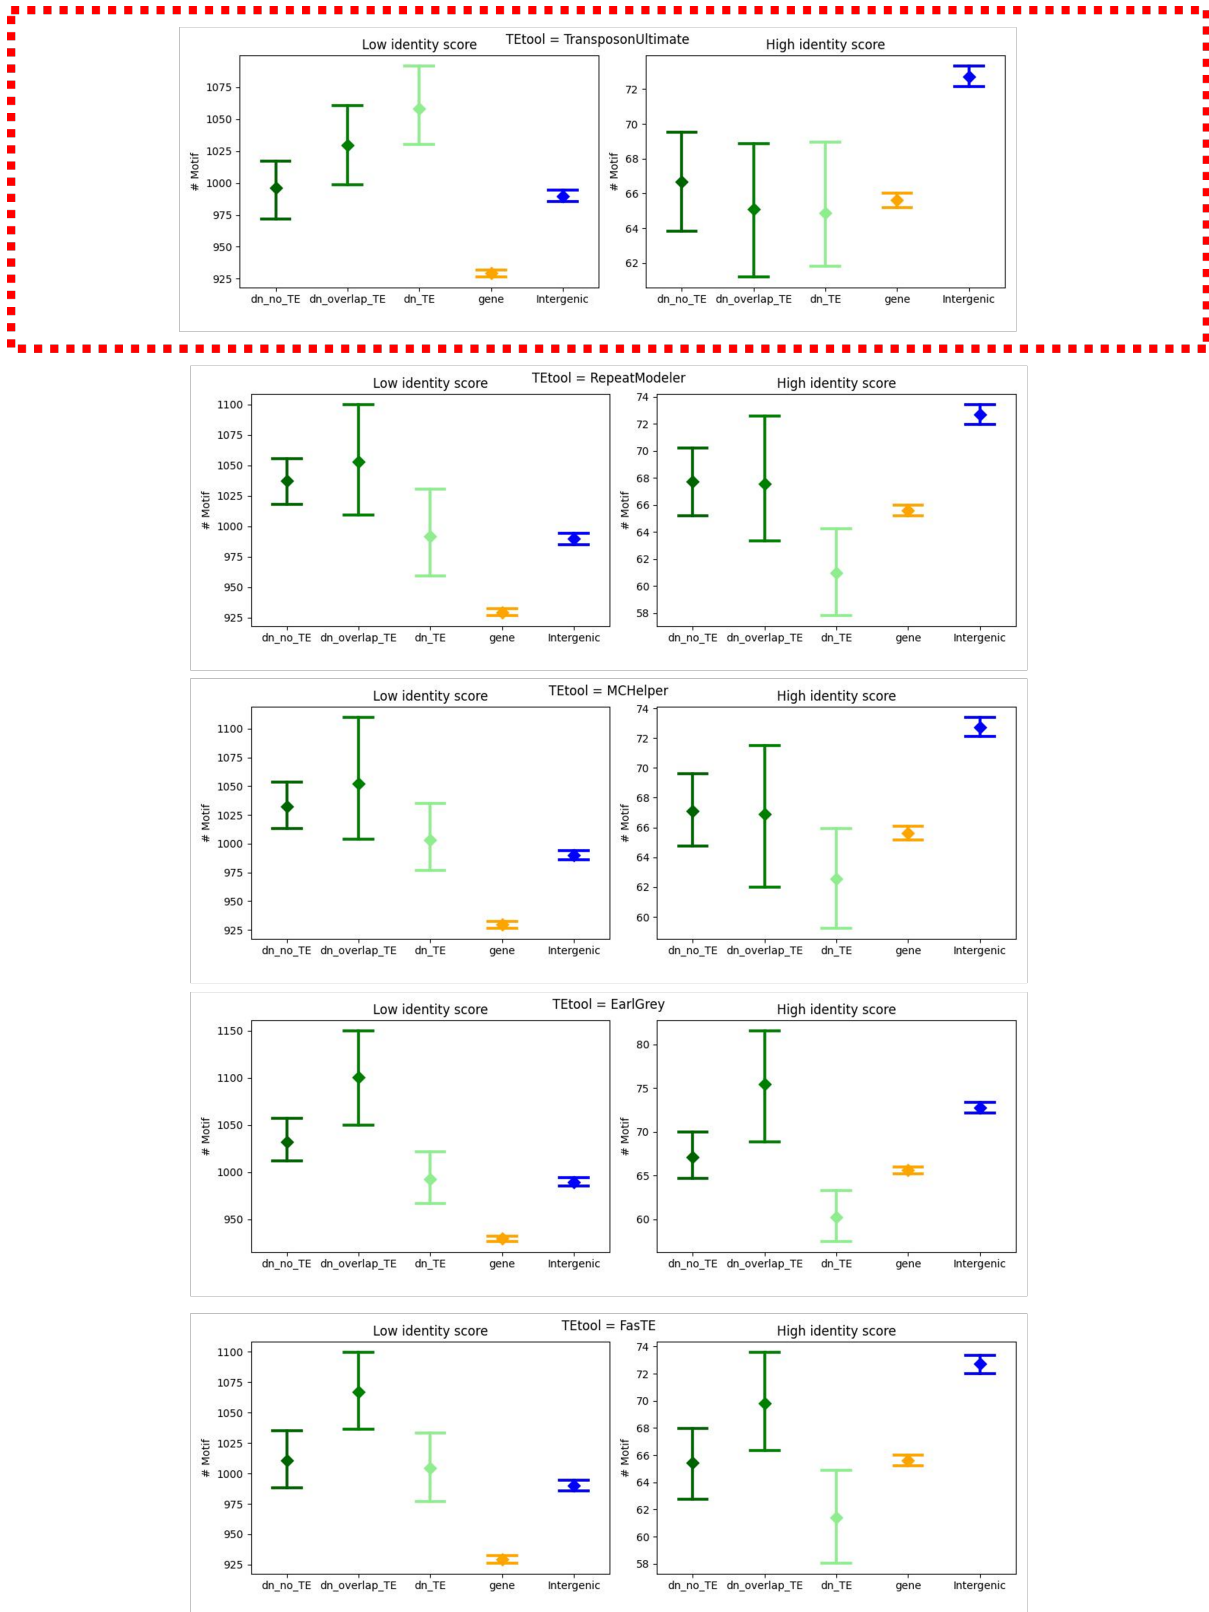

**Figure 2:** Number of promoter/enhancer motifs per upstream region (-1000/+100) based on the TE overlap of the sequence using both a low (left) and high (right) threshold. Shown is Figure 4 from the original paper. In addition to TransposonUltimate (= used in the paper, red box) we ran four additional TE detection and annotation pipelines, namely RepeatModeler, MCHelper (RepeatModeler library), EarlGrey and FasTE (combines EDTA and DeepTE)

**Table 4:** Summary of the statistical Model: NumberMotif ~ Type + (1—population) (family = poisson)

|                                                     | TransposonUltimate                       | RepeatModeler                            | MCHelper                                 | EarlGrey                                 | FasTE                                    |
|-----------------------------------------------------|------------------------------------------|------------------------------------------|------------------------------------------|------------------------------------------|------------------------------------------|
| <b>Model Statistics</b>                             |                                          |                                          |                                          |                                          |                                          |
| AIC                                                 | 14947764                                 | 14948696                                 | 14950062                                 | 14946507                                 | 14947676                                 |
| BIC                                                 | 14947824                                 | 14948756                                 | 14950121                                 | 14946567                                 | 14947736                                 |
| logLik                                              | -7473876                                 | -7474342                                 | -7475025                                 | -7473248                                 | -7473832                                 |
| -2 log(L)                                           | 14947752                                 | 14948684                                 | 14950050                                 | 14946495                                 | 14947664                                 |
| df.resid                                            | 153459                                   | 153459                                   | 153459                                   | 153459                                   | 153459                                   |
| <b>Random Effects</b>                               |                                          |                                          |                                          |                                          |                                          |
| Population (Intercept: Var/SD)                      | 1.314e-06 / 0.001146                     | 1.41e-06 / 0.001187                      | 1.422e-06 / 0.001192                     | 1.399e-06 / 0.001183                     | 1.425e-06 / 0.001194                     |
| <b>Model Summary (Estimate / P(&gt;  z ))</b>       |                                          |                                          |                                          |                                          |                                          |
| (Intercept)                                         | 6.9040831 / < 2 × 10 <sup>-16</sup> ***  | 6.9445219 / < 2 × 10 <sup>-16</sup> ***  | 6.9396559 / < 2 × 10 <sup>-16</sup> ***  | 6.9389725 / < 2 × 10 <sup>-16</sup> ***  | 6.9181389 / < 2 × 10 <sup>-16</sup> ***  |
| Type: Overlap TE                                    | 0.0330892 / < 2 × 10 <sup>-16</sup> ***  | 0.0150026 / < 2 × 10 <sup>-16</sup> ***  | 0.0193734 / < 2 × 10 <sup>-16</sup> ***  | 0.0645010 / < 2 × 10 <sup>-16</sup> ***  | 0.0546187 / < 2 × 10 <sup>-16</sup> ***  |
| Type: TE                                            | 0.0602856 / < 2 × 10 <sup>-16</sup> ***  | -0.0450370 / < 2 × 10 <sup>-16</sup> *** | -0.0284142 / < 2 × 10 <sup>-16</sup> *** | -0.0384727 / < 2 × 10 <sup>-16</sup> *** | -0.0058326 / 4.03 × 10 <sup>-8</sup> *** |
| Type: Gene                                          | -0.0695211 / < 2 × 10 <sup>-16</sup> *** | -0.1099604 / < 2 × 10 <sup>-16</sup> *** | -0.1050946 / < 2 × 10 <sup>-16</sup> *** | -0.1044107 / < 2 × 10 <sup>-16</sup> *** | -0.0835768 / < 2 × 10 <sup>-16</sup> *** |
| Type: Intergenic                                    | -0.0066637 / < 2 × 10 <sup>-16</sup> *** | 0.0471030 / < 2 × 10 <sup>-16</sup> ***  | -0.0422393 / < 2 × 10 <sup>-16</sup> *** | -0.0415523 / < 2 × 10 <sup>-16</sup> *** | -0.0207182 / < 2 × 10 <sup>-16</sup> *** |
| <b>Pairwise Comparisons (Bonferroni-adjusted p)</b> |                                          |                                          |                                          |                                          |                                          |
| No TE / Overlap TE                                  | < .0001                                  | < .0001                                  | < .0001                                  | < .0001                                  | < .0001                                  |
| No TE / TE                                          | < .0001                                  | < .0001                                  | < .0001                                  | < .0001                                  | < .0001                                  |
| No TE / Gene                                        | < .0001                                  | < .0001                                  | < .0001                                  | < .0001                                  | < .0001                                  |
| No TE / Intergenic                                  | < .0001                                  | < .0001                                  | < .0001                                  | < .0001                                  | < .0001                                  |
| Overlap TE / TE                                     | < .0001                                  | < .0001                                  | < .0001                                  | < .0001                                  | < .0001                                  |
| Overlap TE / Gene                                   | < .0001                                  | < .0001                                  | < .0001                                  | < .0001                                  | < .0001                                  |
| Overlap TE / Intergenic                             | < .0001                                  | < .0001                                  | < .0001                                  | < .0001                                  | < .0001                                  |
| TE / Gene                                           | < .0001                                  | < .0001                                  | < .0001                                  | < .0001                                  | < .0001                                  |
| TE / Intergenic                                     | < .0001                                  | 0.1016                                   | < .0001                                  | 0.0006                                   | < .0001                                  |
| Gene / Intergenic                                   | < .0001                                  | < .0001                                  | < .0001                                  | < .0001                                  | < .0001                                  |

**Table 5:** Summary of the statistical Model: NumberMotifHigh ~ Type + (1—population) (family = poisson)

|                                                     | TransposonUltimate                       | RepeatModeler                           | MCHelper                                | EarlGrey                                | FasTE                                   |
|-----------------------------------------------------|------------------------------------------|-----------------------------------------|-----------------------------------------|-----------------------------------------|-----------------------------------------|
| <b>Model Statistics</b>                             |                                          |                                         |                                         |                                         |                                         |
| AIC                                                 | 4707456                                  | 4706729                                 | 4707156                                 | 4705832                                 | 4706694                                 |
| BIC                                                 | 4707515                                  | 4706788                                 | 4707215                                 | 4705892                                 | 4706754                                 |
| logLik                                              | -2353722                                 | -2353358                                | -2353572                                | -2352910                                | -2353341                                |
| -2 log(L)                                           | 4707444                                  | 4706717                                 | 4707144                                 | 4705820                                 | 4706682                                 |
| df.resid                                            | 153459                                   | 153459                                  | 153459                                  | 153459                                  | 153459                                  |
| <b>Random Effects</b>                               |                                          |                                         |                                         |                                         |                                         |
| Population (Intercept: Var/SD)                      | 1.156e-05 / 0.0034                       | 1.155e-05 / 0.003399                    | 1.16e-05 / 0.003405                     | 1.16e-05 / 0.003407                     | 1.166e-05 / 0.003414                    |
| <b>Model Summary (Estimate / P(&gt;  z ))</b>       |                                          |                                         |                                         |                                         |                                         |
| (Intercept)                                         | 4.199720 / < 2 × 10 <sup>-16</sup> ***   | 4.215585 / < 2 × 10 <sup>-16</sup> ***  | 4.206292 / < 2 × 10 <sup>-16</sup> ***  | 4.205884 / < 2 × 10 <sup>-16</sup> ***  | 4.180648 / < 2 × 10 <sup>-16</sup> ***  |
| Type: Overlap TE                                    | -0.023533 / 3.55 × 10 <sup>-8</sup> ***  | -0.002972 / 0.551                       | -0.002799 / 0.595                       | 0.117474 / < 2 × 10 <sup>-16</sup> ***  | 0.065517 / < 2 × 10 <sup>-16</sup> ***  |
| Type: TE                                            | -0.027343 / 3.81 × 10 <sup>-12</sup> *** | -0.105165 / < 2 × 10 <sup>-16</sup> *** | -0.069929 / < 2 × 10 <sup>-16</sup> *** | -0.107519 / < 2 × 10 <sup>-16</sup> *** | -0.063193 / < 2 × 10 <sup>-16</sup> *** |
| Type: Gene                                          | -0.015986 / 1.98 × 10 <sup>-9</sup> ***  | -0.031856 / < 2 × 10 <sup>-16</sup> *** | -0.022563 / < 2 × 10 <sup>-16</sup> *** | -0.022155 / < 2 × 10 <sup>-16</sup> *** | 0.003083 / 0.237                        |
| Type: Intergenic                                    | 0.086875 / < 2 × 10 <sup>-16</sup> ***   | 0.071009 / < 2 × 10 <sup>-16</sup> ***  | 0.080298 / < 2 × 10 <sup>-16</sup> ***  | 0.080714 / < 2 × 10 <sup>-16</sup> ***  | 0.105951 / < 2 × 10 <sup>-16</sup> ***  |
| <b>Pairwise Comparisons (Bonferroni-adjusted p)</b> |                                          |                                         |                                         |                                         |                                         |
| No TE / Overlap TE                                  | < .0001                                  | 1                                       | 1                                       | < .0001                                 | < .0001                                 |
| No TE / TE                                          | < .0001                                  | < .0001                                 | < .0001                                 | < .0001                                 | < .0001                                 |
| No TE / Gene                                        | < .0001                                  | < .0001                                 | < .0001                                 | < .0001                                 | 1                                       |
| No TE / Intergenic                                  | < .0001                                  | < .0001                                 | < .0001                                 | < .0001                                 | < .0001                                 |
| Overlap TE / TE                                     | 1                                        | < .0001                                 | < .0001                                 | < .0001                                 | < .0001                                 |
| Overlap TE / Gene                                   | 0.2572                                   | < .0001                                 | 0.0004                                  | < .0001                                 | < .0001                                 |
| Overlap TE / Intergenic                             | < .0001                                  | < .0001                                 | < .0001                                 | < .0001                                 | < .0001                                 |
| TE / Gene                                           | 0.0012                                   | < .0001                                 | < .0001                                 | < .0001                                 | < .0001                                 |
| TE / Intergenic                                     | < .0001                                  | < .0001                                 | < .0001                                 | < .0001                                 | < .0001                                 |
| Gene / Intergenic                                   | < .0001                                  | < .0001                                 | < .0001                                 | < .0001                                 | < .0001                                 |

### c. Comparison of motifs enrichments between de novo transcripts and their non transcribed homologous sequences

**Table 6:** Anova test (type = "III") for the model (Transcription\_status ~ Coverage (= rel. TE overlap) + Number (= number TE) + Number\_core + binO (= presence TE) :Number\_motifs + (1 — Number\_Orthogroup) + (1 — Population)).

| Tool               | Term               | Chisq       | Df | Pr(>Chisq)             |
|--------------------|--------------------|-------------|----|------------------------|
| TransposonUltimate | (Intercept)        | 69.718892   | 1  | $6.84 \times 10^{-17}$ |
|                    | Coverage           | 278.063131  | 1  | $1.98 \times 10^{-62}$ |
|                    | Number             | 32.058692   | 1  | $1.50 \times 10^{-8}$  |
|                    | Number_core        | 4.576502    | 1  | $3.24 \times 10^{-2}$  |
|                    | binO:Number_motifs | 17.731103   | 1  | $2.54 \times 10^{-5}$  |
| RepeatModeler      | (Intercept)        | 91.40412103 | 1  | $1.17 \times 10^{-21}$ |
|                    | Coverage           | 10.73471437 | 1  | $1.05 \times 10^{-3}$  |
|                    | Number             | 22.80459691 | 1  | $1.79 \times 10^{-6}$  |
|                    | Number_core        | 3.38218145  | 1  | $6.59 \times 10^{-2}$  |
|                    | binO:Number_motifs | 0.06602595  | 1  | $7.97 \times 10^{-1}$  |
| MCHelper           | (Intercept)        | 89.0769015  | 1  | $3.80 \times 10^{-21}$ |
|                    | Coverage           | 7.0254064   | 1  | $8.04 \times 10^{-3}$  |
|                    | Number             | 23.5274094  | 1  | $1.23 \times 10^{-6}$  |
|                    | Number_core        | 3.6741814   | 1  | $5.53 \times 10^{-2}$  |
|                    | binO:Number_motifs | 0.2908766   | 1  | $5.90 \times 10^{-1}$  |
| EarlGrey           | (Intercept)        | 89.9397236  | 1  | $2.46 \times 10^{-21}$ |
|                    | Coverage           | 11.95692048 | 1  | $5.44 \times 10^{-4}$  |
|                    | Number             | 26.40619463 | 1  | $2.77 \times 10^{-7}$  |
|                    | Number_core        | 3.467874863 | 1  | $6.26 \times 10^{-2}$  |
|                    | binO:Number_motifs | 0.005539105 | 1  | $9.41 \times 10^{-1}$  |
| FasTE              | (Intercept)        | 102.9667483 | 1  | $3.41 \times 10^{-24}$ |
|                    | Coverage           | 11.1987402  | 1  | $8.19 \times 10^{-4}$  |
|                    | Number             | 17.8812966  | 1  | $2.35 \times 10^{-5}$  |
|                    | Number_core        | 2.1835251   | 1  | $1.39 \times 10^{-1}$  |
|                    | binO:Number_motifs | 0.5561409   | 1  | $4.56 \times 10^{-1}$  |

**Table 7:** Summary of the statistical Model: Transcription\_status ~ Coverage (= rel. TE overlap) + Number (= number TE) + Number\_core + binO (= presence TE) :Number\_motifs + (1 — Number\_Orthogroup) + (1 — Population)

| Tool / Variable                                                                   | Term               | Estimate / Variance                            | Pr(>—z—)                  |
|-----------------------------------------------------------------------------------|--------------------|------------------------------------------------|---------------------------|
| <b>TransposonUltimate</b>                                                         |                    |                                                |                           |
| AIC=9984.7, BIC=10036.4, logLik=-4985.4, $-2 \log(L) = 9970.7$ , df.resid=11788   |                    |                                                |                           |
| <b>Random effects (Variance / Std.Dev)</b>                                        |                    |                                                |                           |
| NumberOrthogroups                                                                 | (Intercept)        | $1.157 \times 10^{-9} / 3.401 \times 10^{-5}$  |                           |
| Population                                                                        | (Intercept)        | $4.286 \times 10^{-2} / 2.070 \times 10^{-1}$  |                           |
| <b>Conditional model</b>                                                          |                    |                                                |                           |
|                                                                                   | (Intercept)        | -1.21                                          | $< 2 \times 10^{-16}$ *** |
|                                                                                   | Coverage           | -2.82                                          | $< 2 \times 10^{-16}$ *** |
|                                                                                   | Number             | $1.45 \times 10^{-1}$                          | $1.50 \times 10^{-8}$ *** |
|                                                                                   | Number_core        | $-4.80 \times 10^{-3}$                         | $3.24 \times 10^{-2}$ *   |
|                                                                                   | binO:Number_motifs | $3.24 \times 10^{-4}$                          | $2.54 \times 10^{-5}$ *** |
| <b>RepeatModeler</b>                                                              |                    |                                                |                           |
| AIC=10482.4, BIC=10534.0, logLik=-5234.2, $-2 \log(L) = 10468.4$ , df.resid=11788 |                    |                                                |                           |
| <b>Random effects (Variance / Std.Dev)</b>                                        |                    |                                                |                           |
| NumberOrthogroups                                                                 | (Intercept)        | $5.705 \times 10^{-10} / 2.389 \times 10^{-5}$ |                           |
| Population                                                                        | (Intercept)        | $3.728 \times 10^{-2} / 1.931 \times 10^{-1}$  |                           |
| <b>Conditional model</b>                                                          |                    |                                                |                           |
|                                                                                   | (Intercept)        | -1.40                                          | $< 2 \times 10^{-16}$ *** |
|                                                                                   | Coverage           | $-3.05 \times 10^{-1}$                         | $1.05 \times 10^{-3}$ **  |

| Tool / Model component                                                            | Term               | Estimate / Variance                            | Pr(>—z—)                  |
|-----------------------------------------------------------------------------------|--------------------|------------------------------------------------|---------------------------|
|                                                                                   | Number             | 9.22                                           | $1.79 \times 10^{-6}$ *** |
|                                                                                   | Number_core        | $-4.17 \times 10^{-3}$                         | $6.59 \times 10^{-2}$ .   |
|                                                                                   | binO:Number_motifs | $2.13 \times 10^{-5}$                          | $7.97 \times 10^{-1}$     |
| <b>MCHelper</b>                                                                   |                    |                                                |                           |
| AIC=10483.1, BIC=10534.7, logLik=-5234.5, $-2 \log(L) = 10469.1$ , df.resid=11788 |                    |                                                |                           |
| <b>Random effects (Variance / Std.Dev)</b>                                        |                    |                                                |                           |
| NumberOrthogroups                                                                 | (Intercept)        | $7.553 \times 10^{-10} / 2.748 \times 10^{-5}$ |                           |
| Population                                                                        | (Intercept)        | $3.832 \times 10^{-2} / 1.958 \times 10^{-1}$  |                           |
| <b>Conditional model</b>                                                          |                    |                                                |                           |
|                                                                                   | (Intercept)        | -1.39                                          | $< 2 \times 10^{-16}$ *** |
|                                                                                   | Coverage           | $-2.49 \times 10^{-1}$                         | $8.04 \times 10^{-3}$ **  |
|                                                                                   | Number             | $1.21 \times 10^{-1}$                          | $1.23 \times 10^{-6}$ *** |
|                                                                                   | Number_core        | $-4.35 \times 10^{-3}$                         | $5.53 \times 10^{-2}$ .   |
|                                                                                   | binO:Number_motifs | $-4.73 \times 10^{-5}$                         | $5.90 \times 10^{-1}$     |
| <b>EarlGrey</b>                                                                   |                    |                                                |                           |
| AIC=10477.7, BIC=10529.3, logLik=-5231.8, $-2 \log(L) = 10463.7$ , df.resid=11788 |                    |                                                |                           |
| <b>Random effects (Variance / Std.Dev)</b>                                        |                    |                                                |                           |
| NumberOrthogroups                                                                 | (Intercept)        | $1.052 \times 10^{-9} / 3.243 \times 10^{-5}$  |                           |
| Population                                                                        | (Intercept)        | $3.799 \times 10^{-2} / 1.949 \times 10^{-1}$  |                           |
| <b>Conditional model</b>                                                          |                    |                                                |                           |
|                                                                                   | (Intercept)        | -1.40                                          | $< 2 \times 10^{-16}$ *** |
|                                                                                   | Coverage           | $-3.23 \times 10^{-1}$                         | $5.44 \times 10^{-4}$ *** |
|                                                                                   | Number             | $1.66 \times 10^{-1}$                          | $2.77 \times 10^{-7}$ *** |
|                                                                                   | Number_core        | $-4.23 \times 10^{-3}$                         | $6.26 \times 10^{-2}$ .   |
|                                                                                   | binO:Number_motifs | $-6.73 \times 10^{-6}$                         | $9.41 \times 10^{-1}$     |
| <b>FasTE</b>                                                                      |                    |                                                |                           |
| AIC=10487.5, BIC=10539.1, logLik=-5236.7, $-2 \log(L) = 10473.5$ , df.resid=11788 |                    |                                                |                           |
| <b>Random effects (Variance / Std.Dev)</b>                                        |                    |                                                |                           |
| NumberOrthogroups                                                                 | (Intercept)        | $6.802 \times 10^{-10} / 2.608 \times 10^{-5}$ |                           |
| Population                                                                        | (Intercept)        | $3.784 \times 10^{-2} / 1.945 \times 10^{-1}$  |                           |
| <b>Conditional model</b>                                                          |                    |                                                |                           |
|                                                                                   | (Intercept)        | -1.46                                          | $< 2 \times 10^{-16}$ *** |
|                                                                                   | Coverage           | $-2.89 \times 10^{-1}$                         | $8.19 \times 10^{-4}$ *** |
|                                                                                   | Number             | $5.47 \times 10^{-2}$                          | $2.35 \times 10^{-5}$ *** |
|                                                                                   | Number_core        | $-3.28 \times 10^{-3}$                         | $1.39 \times 10^{-1}$     |
|                                                                                   | binO:Number_motifs | $5.12 \times 10^{-5}$                          | $4.56 \times 10^{-1}$     |

## References
